# Supplementary material for: Hydrodeoxygenation of oleic acid over NiCu bimetallic catalysts supported on Mo-modified niobium phosphate
Source: Royal Society of Chemistry journal article supplement (doi:10.1039/d4nj04885g), 2025-01-01
Supplement: d4nj04885g1.pdf [file d4nj04885g1.pdf]

## Supporting Information

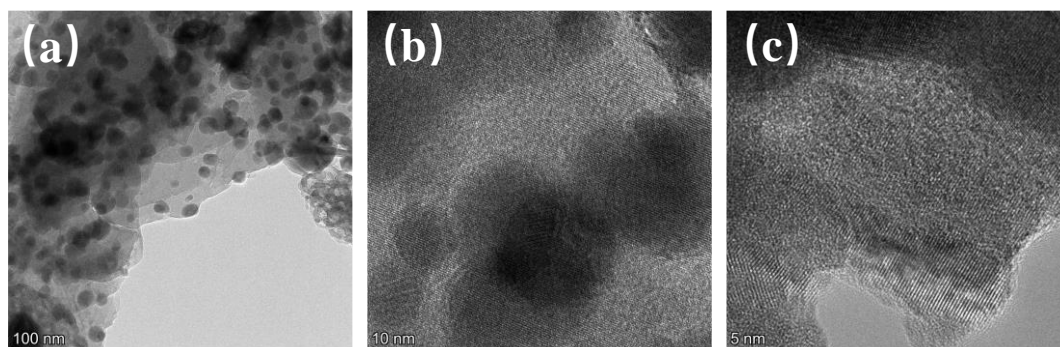

**Fig. S1** HR-TEM images of NiCu/10%Mo- NbOPO<sub>4</sub>

**Table S1** Results of the Mo content of the modified supports

| Sample                       | Sampling amount(g) | Constant volume V0(mL) | Test elements | Element concentration C0(mg/L) | Elemental content wt. (%) |
|------------------------------|--------------------|------------------------|---------------|--------------------------------|---------------------------|
| 5%Mo-<br>NbOPO <sub>4</sub>  | 0.0343             | 25                     | Mo            | 29.88                          | 2.18                      |
|                              | 0.0343             | 25                     | Mo            | 29.90                          | 2.18                      |
|                              | 0.0343             | 25                     | Mo            | 29.88                          | 2.18                      |
| 10%Mo-<br>NbOPO <sub>4</sub> | 0.0335             | 25                     | Mo            | 55.48                          | 4.14                      |
|                              | 0.0335             | 25                     | Mo            | 55.48                          | 4.14                      |
|                              | 0.0335             | 25                     | Mo            | 55.47                          | 4.14                      |
| 15%Mo-<br>NbOPO <sub>4</sub> | 0.0363             | 25                     | Mo            | 84.87                          | 5.84                      |
|                              | 0.0363             | 25                     | Mo            | 84.97                          | 5.85                      |
|                              | 0.0363             | 25                     | Mo            | 85.04                          | 5.86                      |

**Table S2** Theoretical and practical content of modified supports

| Sample                    | Practical elemental content wt. (%) | Theoretical elemental content wt. (%) | Error (%) |
|---------------------------|-------------------------------------|---------------------------------------|-----------|
| 5%Mo-NbOPO <sub>4</sub>   | 2.18                                | 2.72                                  | 19.85     |
| 10%Mo- NbOPO <sub>4</sub> | 4.14                                | 5.29                                  | 21.74     |
| 15%Mo- NbOPO <sub>4</sub> | 5.85                                | 7.73                                  | 24.32     |

**Table S3** Crystallite and average size from XRD

|           | Peak Position<br>(2 Theta) | FWHM (Full<br>width at half<br>maximum) | Crystallite Size<br>D(nm) | D nm<br>(Average) |
|-----------|----------------------------|-----------------------------------------|---------------------------|-------------------|
| <b>Cu</b> | 43.33                      | 0.258                                   | 33.13                     | <b>30.26</b>      |
|           | 50.46                      | 0.377                                   | 23.29                     |                   |
|           | 74.14                      | 0.290                                   | 34.38                     |                   |
| <b>Ni</b> | 44.65                      | 0.324                                   | 26.49                     | <b>29.17</b>      |
|           | 76.58                      | 0.266                                   | 38.04                     |                   |
|           | 51.88                      | 0.386                                   | 22.98                     |                   |

**Table S4** The catalytic activities for HDO of oleic acid over different catalysts <sup>a</sup>

| Catalysts                     | Conversion (%) | Selectivity (%) |            |
|-------------------------------|----------------|-----------------|------------|
|                               |                | Heptadecane     | Octadecane |
| Ni/NbOPO <sub>4</sub>         | 62.87          | 22.88           | 12.34      |
| NiCu/NbOPO <sub>4</sub>       | 70.87          | 14.23           | 16.52      |
| NiCu/5%Mo-NbOPO <sub>4</sub>  | 70.94          | 7.68            | 24.59      |
| NiCu/10%Mo-NbOPO <sub>4</sub> | 81.39          | 8.18            | 52.03      |
| NiCu/15%Mo-NbOPO <sub>4</sub> | 82.48          | 7.12            | 49.24      |

<sup>a</sup> Reaction conditions: catalyst 0.5 g, oleic acid 2.5 g, reaction temperature 230 °C reaction time 7 h, initial H<sub>2</sub> pressure 3.0 MPa.

**Table S5** Effects of H<sub>2</sub> initial pressure on HDO reaction of oleic acid

| Catalyst                | H <sub>2</sub> Pressure<br>(MPa) | Conversion<br>(%) | Selectivity (%) |            |
|-------------------------|----------------------------------|-------------------|-----------------|------------|
|                         |                                  |                   | Heptadecane     | Octadecane |
| NiCu/NbOPO <sub>4</sub> | 2                                | 99.53             | 36.00           | 27.33      |
|                         | 3                                | 99.52             | 39.06           | 53.10      |
|                         | 4                                | 99.53             | 27.69           | 54.67      |
|                         | 5                                | 99.55             | 24.46           | 58.18      |

Reaction conditions: catalyst 0.5 g, oleic acid 2.5 g, reaction temperature 260 °C reaction time 7 h.

**Table S6** Effects of reaction time on HDO reaction of oleic acid

| Catalyst                | Time (h) | Conversion (%) | Selectivity (%) |            |
|-------------------------|----------|----------------|-----------------|------------|
|                         |          |                | Heptadecane     | Octadecane |
| NiCu/NbOPO <sub>4</sub> | 5        | 90.33          | 28.57           | 35.64      |
|                         | 6        | 93.33          | 32.20           | 37.51      |
|                         | 7        | 99.52          | 39.06           | 53.10      |
|                         | 8        | 99.52          | 41.02           | 47.56      |
|                         | 9        | 99.52          | 43.19           | 46.43      |

Reaction conditions: catalyst 0.5 g, oleic acid 2.5 g, reaction temperature 260 °C, initial H<sub>2</sub> pressure 3.0 MPa.

**Table S7** Results of metal residues in the liquid phase of the NiCu/10Mo%-NbOPO<sub>4</sub> catalyst

| Sample                            | Sampling amount (mL) | Constant volume V0 (mL) | Test elements | Element concentration C0(mg/L) | Dilution factor (f) | Element concentration (original sample solution) C1 (mg/L) |
|-----------------------------------|----------------------|-------------------------|---------------|--------------------------------|---------------------|------------------------------------------------------------|
| NiCu/10Mo%<br>-NbOPO <sub>4</sub> | 1                    | 10                      | Ni            | 0.188                          | 10                  | 1.88                                                       |
|                                   | 1                    | 10                      | Ni            | 0.188                          | 10                  | 1.88                                                       |
|                                   | 1                    | 10                      | Ni            | 0.19                           | 10                  | 1.90                                                       |
| Liquid phase<br>products          | 1                    | 10                      | Cu            | 0.008                          | 10                  | 0.08                                                       |
|                                   | 1                    | 10                      | Cu            | 0.006                          | 10                  | 0.06                                                       |
|                                   | 1                    | 10                      | Cu            | 0.007                          | 10                  | 0.07                                                       |
